# Supplementary material
Source: Springer Nature journal article supplement (https://www.springermedizin.de/resource/supplementary/12865_2009_308_MOESM5_ESM.pdf/9427718)

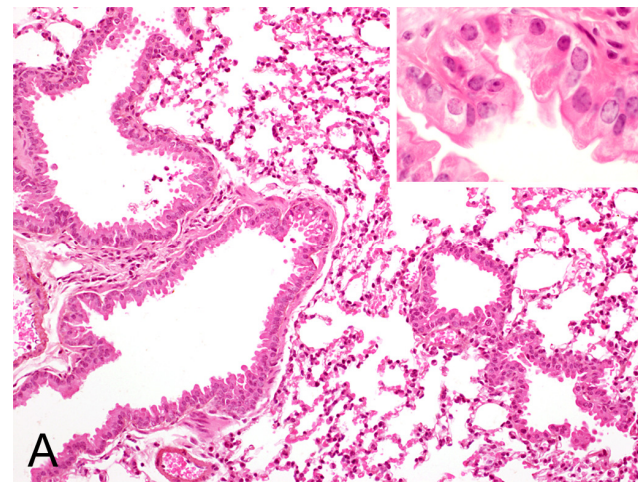

**A**

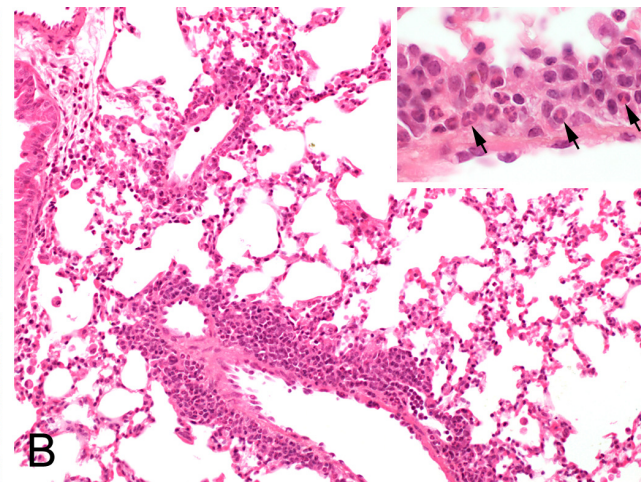

**B**

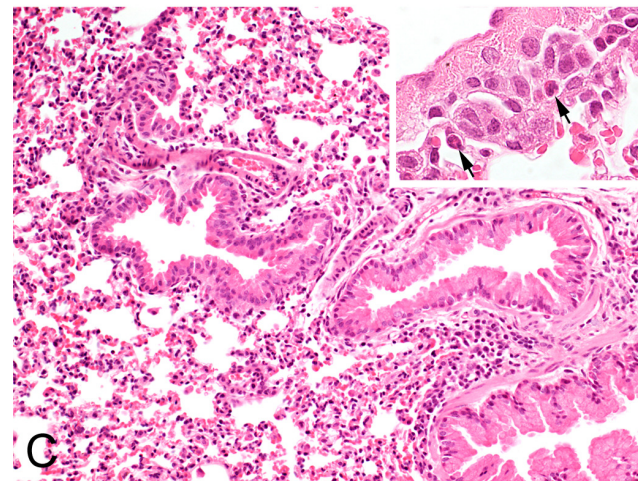

**C**

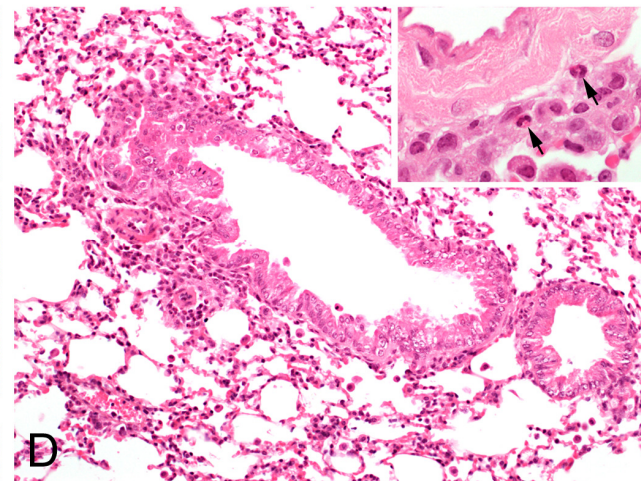

**D**

**E**

| group   | scoring grades (0 to 4) |                       |
|---------|-------------------------|-----------------------|
|         | inflammation            | eosinophils           |
| control | 0.69 ± 0.07             | 0.24 ± 0.05           |
| PBS     | 3.32 ± 0.09             | 2.01 ± 0.11           |
| dex     | 2.37 ± 0.11 (p<0.001)   | 1.39 ± 0.10 (p<0.001) |
| escin   | 2.63 ± 0.07 (p<0.001)   | 1.17 ± 0.06 (p<0.001) |

Supplement: MOESM5 [file 9427718]
